# Supplementary material for: Viability and Functionality of Neonatal Porcine Islet-like Cell Clusters Bioprinted in Alginate-Based Bioinks
Source: MDPI journal article supplement (doi:10.3390/biomedicines10061420), 2022-06-15
Supplement: s1 [file s1]

# Supplementary information

For

## Viability and functionality of neonatal porcine islet-like cell clusters bioprinted in alginate-based hydrogel blends

**Sarah Duin<sup>1\*</sup>, Shreya Bhandarkar<sup>1</sup>, Susann Lehmann<sup>2</sup>, Elisabeth Kemter<sup>3</sup>, Eckhard Wolf<sup>3</sup>, Michael Gelinsky<sup>1</sup>, Barbara Ludwig<sup>2,4</sup>, Anja Lode<sup>1</sup>**

<sup>1</sup> Centre for Translational Bone, Joint and Soft Tissue Research, University Hospital *Carl Gustav Carus* and Faculty of Medicine of Technische Universität Dresden, Germany

<sup>2</sup> Paul Langerhans Institute Dresden of Helmholtz Centre Munich at University Hospital Carl Gustav Carus, Technische Universität Dresden and German Centre for Diabetes Research (DZD), Dresden, Germany

<sup>3</sup> Chair for Molecular Animal Breeding and Biotechnology, Gene Center, and Center for Innovative Medical models (CiMM), Ludwig-Maximilians University Munich, München, and German Centre for Diabetes Research (DZD), Neuherberg, Germany

<sup>4</sup> Medical Clinic III, University Hospital Carl Gustav Carus, Technische Universität Dresden, Germany

\* Corresponding author: Sarah Duin, telephone: +49 351 458-16692, fax number: +49 351 458-7210, email address: sarah.duin@tu-dresden.de

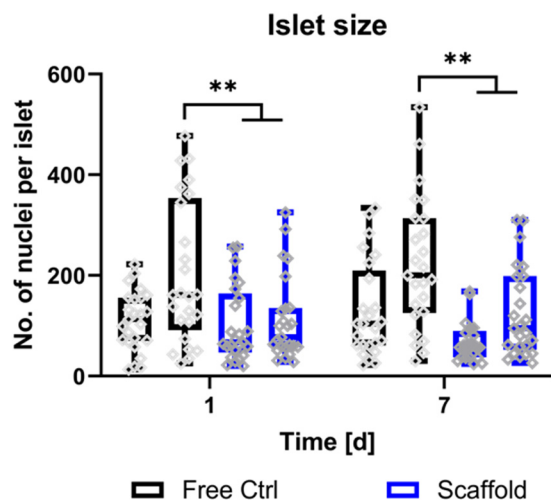

**Supplementary Figure S1:** Size distribution of NICC in suspension culture and bioprinted in algMC scaffolds determined by means of counting nuclei in DAPI stained 2D cross-sections. Mean  $\pm$  SD, n=2 experiments, 25 islets each, \*\* $p < 0.01$ . Repeat experiments depicted as neighbouring box plots, grey dots indicate individual islets.

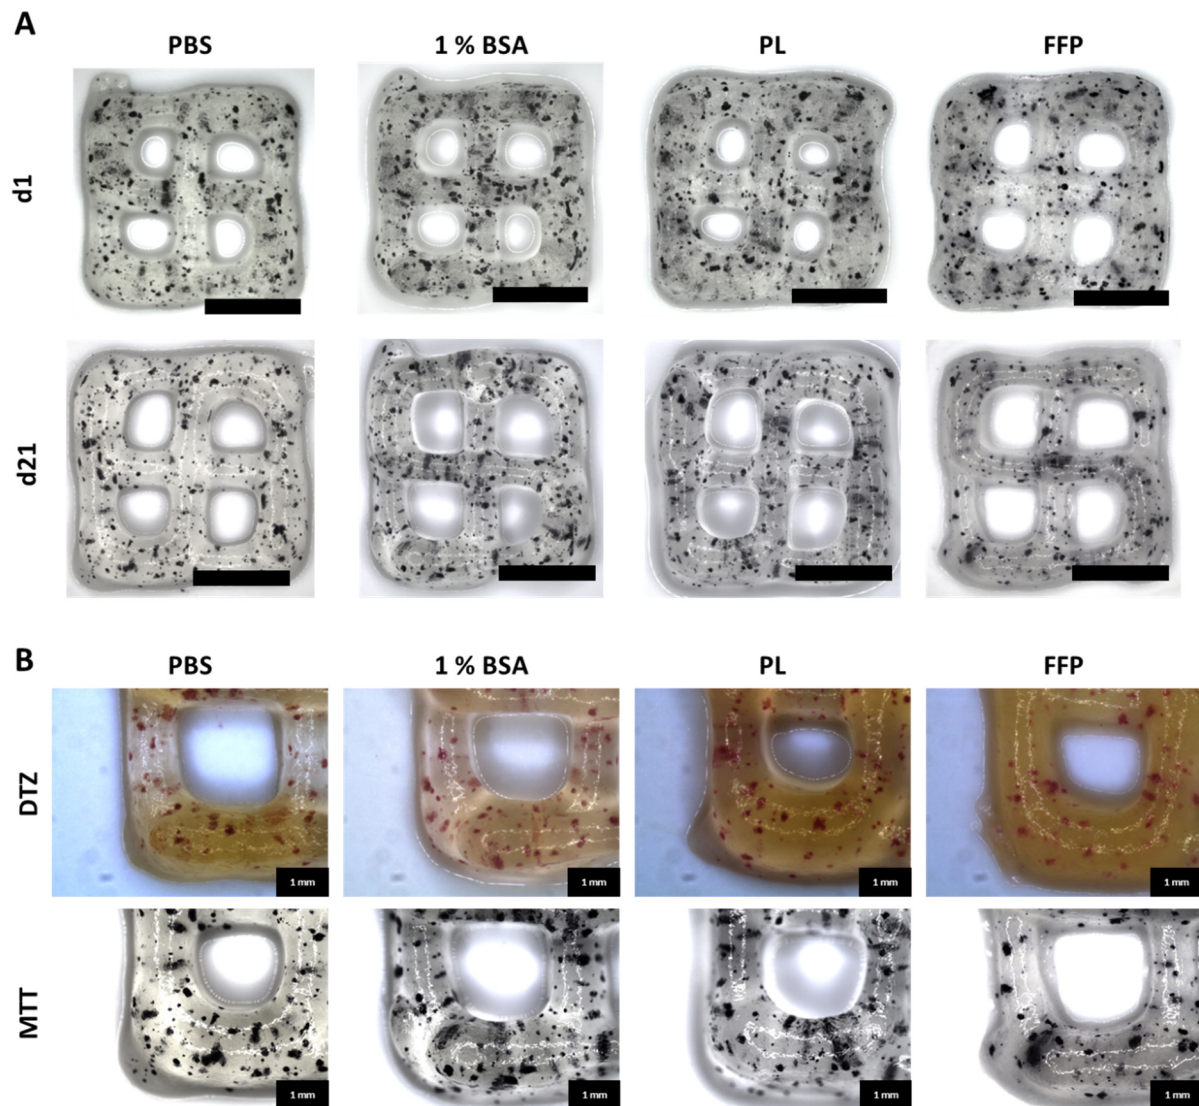

**Supplementary Figure S2:** Macroscopic view of the distribution, insulin content (DTZ), and metabolic activity (MTT) of biprinted NICC in (supplemented) bioinks. Depicted are NICC bioprinted in PBS-algMC, BSA-algMC, PL-algMC, and FFP-algMC on d21 after bioprinting. (a) Representative images of the entire scaffold on day 1 and day 21 of incubation, showing form-stability. NICC stained with MTT, scale bars = 2 mm. (b) Magnified view of one corner of the scaffolds, NICC stained with DTZ or MTT, scale bars = 1 mm.

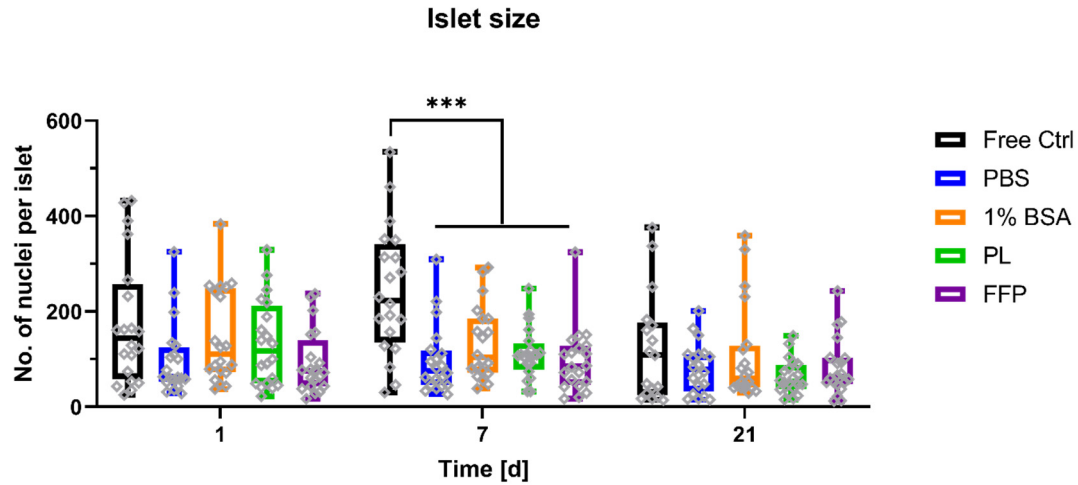

**Supplementary Figure S3:** Size distribution of NICC in suspension culture and bioprinted in (supplemented) algMC scaffolds determined by means of counting nuclei in DAPI stained 2D cross-sections. Mean  $\pm$  SD,  $n=1$  experiment, 20 islets, \*\*\* $p<0.001$ , grey dots indicate individual islets.

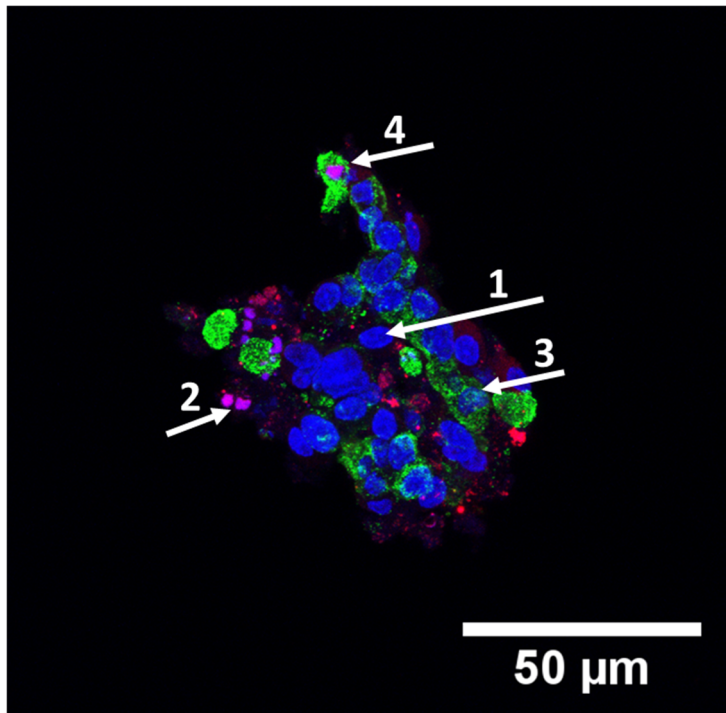

**Supplementary Figure S4:** Exemplary depiction of a cryosection used for quantitative analysis of insulin-containing cells within NICC. Indicated by numbered arrows, the different states that were considered are viable (1), apoptotic (2), viable insulin-containing (3), and apoptotic insulin-containing (4).
